# Supplementary material
Source: ML conference proceedings conference paper supplement (https://openaccess.thecvf.com/content/WACV2024/html/ElHabebe_DR10K_Transfer_Learning_WACV_2024_paper.html)
Supplement: Supplementary file 3 [file ElHabebe_DR10K_Transfer_Learning_WACV_2024_supplemental.zip]

Archive with 2 entries (2 files):
- 0640-supp/Appendix A.pdf
- 0640-supp/Appendix B.pdf
